# Supplementary material for: Family-Based Genome-Wide Association Study of Autism Spectrum Disorder in Middle Eastern Families
Source: MDPI journal article supplement (doi:10.3390/genes12050761), 2021-05-18
Supplement: s1 [file s1]

# Family Based Genome-Wide Association Study of Autism Spectrum Disorder in Middle Eastern Families

Yasser Al-Sarraj<sup>1,2</sup>, Eman Al-Dous<sup>1,2</sup>, Rowaida Z. Taha<sup>2</sup>, Dina Ahram<sup>2,3</sup>, Fouad Alshaban<sup>2</sup>, Mohammed Tolfat<sup>4</sup>, Hatem El-Shanti<sup>2,5</sup> and Omar M.E. Albagha<sup>1,2,6\*</sup>

<sup>1</sup> College of Health and Life Sciences, Hamad Bin Khalifa University, Doha 34110, Qatar; yalsarraj@qf.org.qa (Y.A.-S.); eyaldous@hbku.edu.qa (E.A.-D.)

<sup>2</sup> Qatar Biomedical Research Institute (QBRI), Hamad Bin Khalifa University, Doha 34110, Qatar; rtaha@hbku.edu.qa (R.Z.T.); da2747@cumc.columbia.edu (D.A.); falshaban@hbku.edu.qa (F.A.); hatem-el-shanti@uiowa.edu (H.E.-S.)

<sup>3</sup> Division of Nephrology, Columbia University Medical Center, New York, NY 10032, USA

<sup>4</sup> The Shafallah Center for Children with Special Needs, Doha 33123, Qatar; Mohamed.Tolfat@shafallah.org.qa

<sup>5</sup> Department of Pediatrics, Carver College of Medicine, University of Iowa, Iowa City, IA 52242, USA

<sup>6</sup> Centre for Genomic and Experimental Medicine, Institute of Genetics and Molecular Medicine, University of Edinburgh, Edinburgh EH4 2XU, UK

\* Correspondence: oalbagha@hbku.edu.qa

## Supplementary Materials

**Supplementary Table S1.** Family structure of the study subjects

| Number of Families | Unaffected parents | Child with ASD | Unaffected Child | Total number of subjects |
|--------------------|--------------------|----------------|------------------|--------------------------|
| 103                | 2                  | 1              | 0                | 309                      |
| 1                  | 2                  | 2              | 1                | 5                        |
| 22                 | 2                  | 0              | 1                | 66                       |
| 28                 | 1                  | 1              | 0                | 56                       |
| 6                  | 1                  | 0              | 1                | 12                       |
| 1                  | 2                  | 1              | 1                | 4                        |
| 1                  | 2                  | 0              | 2                | 4                        |
| 1                  | 1                  | 2              | 0                | 3                        |
| 1                  | 1                  | 3              | 0                | 4                        |
| 7                  | 0                  | 1              | 0                | 7                        |
| 4                  | 2                  | 0              | 0                | 8                        |
| 9                  | 1                  | 0              | 0                | 9                        |

**Supplementary Table S2.** Replication signals for the lead SNP rs10099100\*.

| Proxy SNP | Bp to lead SNP | iPSYCH Data |      | LD from EUR 1000 Genome |                | Our Data |      |
|-----------|----------------|-------------|------|-------------------------|----------------|----------|------|
|           |                | P-value     | OR   | D'                      | R <sup>2</sup> | P-value  | OR   |
| rs6601521 | -52172         | 0.001       | 0.95 | 0.93                    | 0.30           | 0.013    | 0.95 |
| rs7826189 | -51085         | 0.024       | 1.03 | 0.53                    | 0.14           | 0.04     | 1.04 |
| rs733396  | -45206         | 0.01        | 1.03 | 0.53                    | 0.14           | 0.003    | 1.06 |
| rs6601518 | -28459         | 0.01        | 1.03 | 0.58                    | 0.21           | 0.038    | 1.04 |
| rs7827623 | 35844          | 0.007       | 0.95 | 0.90                    | 0.37           | 0.03     | 0.95 |

\*We searched for close proxies (within 100 kb) in Linkage disequilibrium (LD) with the lead SNP based on LD data from European population from 1000 Genome (since the previously identified lead SNPs were found in studies of European populations). We then checked if the proxies were genotyped in our data set and compared results.

**Supplementary Table S3.** Replication analysis for SNPs with  $P < 1 \times 10^{-5}$  from the GWAS catalog\*.

|            | GWAS Catalog  |      |          | Our Data      |      |      | Effect         |          |
|------------|---------------|------|----------|---------------|------|------|----------------|----------|
| SNP        | Effect allele | OR   | P        | Effect Allele | OR   | P    | Same Direction | PMID     |
| rs910805   | NA            | NA   | 1.00E-10 | G             | 1.00 | 0.88 | NA             | 32606422 |
| rs8453     | G             | NA   | 3.00E-08 | G             | 0.92 | 0.08 | NA             | 24189344 |
| rs6508210  | NA            | NA   | 3.00E-08 | C             | 1.00 | 0.95 | NA             | 32606422 |
| rs6537825  | A             | 1.4  | 3.00E-08 | A             | 0.98 | 0.58 | No             | 24189344 |
| rs3827735  | C             | NA   | 6.00E-08 | C             | 1.04 | 0.13 | NA             | 24189344 |
| rs6537825  | A             | NA   | 6.00E-08 | A             | 0.98 | 0.58 | NA             | 24189344 |
| rs11585926 | T             | NA   | 6.00E-08 | T             | 0.97 | 0.19 | NA             | 24189344 |
| rs11587400 | C             | NA   | 7.00E-08 | C             | 1.00 | 0.93 | NA             | 24189344 |
| rs10858047 | T             | NA   | 8.00E-08 | T             | 1.02 | 0.64 | NA             | 24189344 |
| rs10489525 | G             | NA   | 9.00E-08 | G             | 1.02 | 0.47 | NA             | 24189344 |
| rs8453     | G             | NA   | 9.00E-08 | G             | 0.92 | 0.08 | NA             | 24189344 |
| rs4150167  | NA            | 1.96 | 3.00E-07 | A             | 1.03 | 0.43 | NA             | 22843504 |
| rs910805   | G             | 1.08 | 3.00E-07 | G             | 1.00 | 0.88 | Yes            | 30804558 |
| rs2391769  | G             | 1.07 | 5.00E-07 | G             | 1.01 | 0.59 | Yes            | 30804558 |
| rs2635182  | T             | 1.07 | 5.00E-07 | T             | 1.02 | 0.31 | Yes            | 30804558 |
| rs1452075  | T             | 1.07 | 6.00E-07 | T             | 0.98 | 0.49 | No             | 30804558 |
| rs7711337  | NA            | 1.22 | 8.00E-07 | A             | 1.04 | 0.07 | NA             | 22843504 |
| rs7834018  | NA            | 1.56 | 8.00E-07 | G             | 1.00 | 0.98 | NA             | 22843504 |
| rs11185408 | G             | 1.06 | 1.00E-06 | G             | 0.98 | 0.29 | No             | 30804558 |
| rs6538761  | A             | 1.24 | 2.00E-06 | A             | 1.00 | 0.82 | Yes            | 24189344 |
| rs10038113 | T             | 1.33 | 3.00E-06 | T             | 0.97 | 0.21 | No             | 19456320 |
| rs4916723  | C             | 1.06 | 3.00E-06 | C             | 1.00 | 0.93 | Yes            | 30804558 |
| rs7142002  | NA            | 1.56 | 3.00E-06 | G             | 1.05 | 0.16 | NA             | 20663923 |
| rs10742763 | T             | 1.31 | 4.00E-06 | T             | 1.14 | 0.06 | Yes            | 32747698 |
| rs6453278  | NA            | 1.25 | 5.00E-06 | C             | 1.01 | 0.82 | NA             | 19812673 |
| rs7627815  | T             | 1.38 | 8.00E-06 | T             | 0.95 | 0.36 | No             | 32747698 |
| rs2280840  | G             | NA   | 9.00E-06 | G             | 1.00 | 0.99 | NA             | 32996047 |
| rs6599528  | A             | NA   | 9.00E-06 | A             | 1.00 | 0.83 | NA             | 32996047 |
| rs2447097  | A             | 1.53 | 9.00E-06 | A             | 1.00 | 0.82 | Yes            | 26398136 |

\*GWAS catalog data were retrieved from <https://www.ebi.ac.uk/gwas/home> using autism or autism spectrum disorder as phenotype. OR; odds ratio for effect allele, PMID; PubMed ID.

**Supplementary Figure S1.** Regional association plot for chr 2q31.1 (a) and 4q32.1 (b) regions

**a**

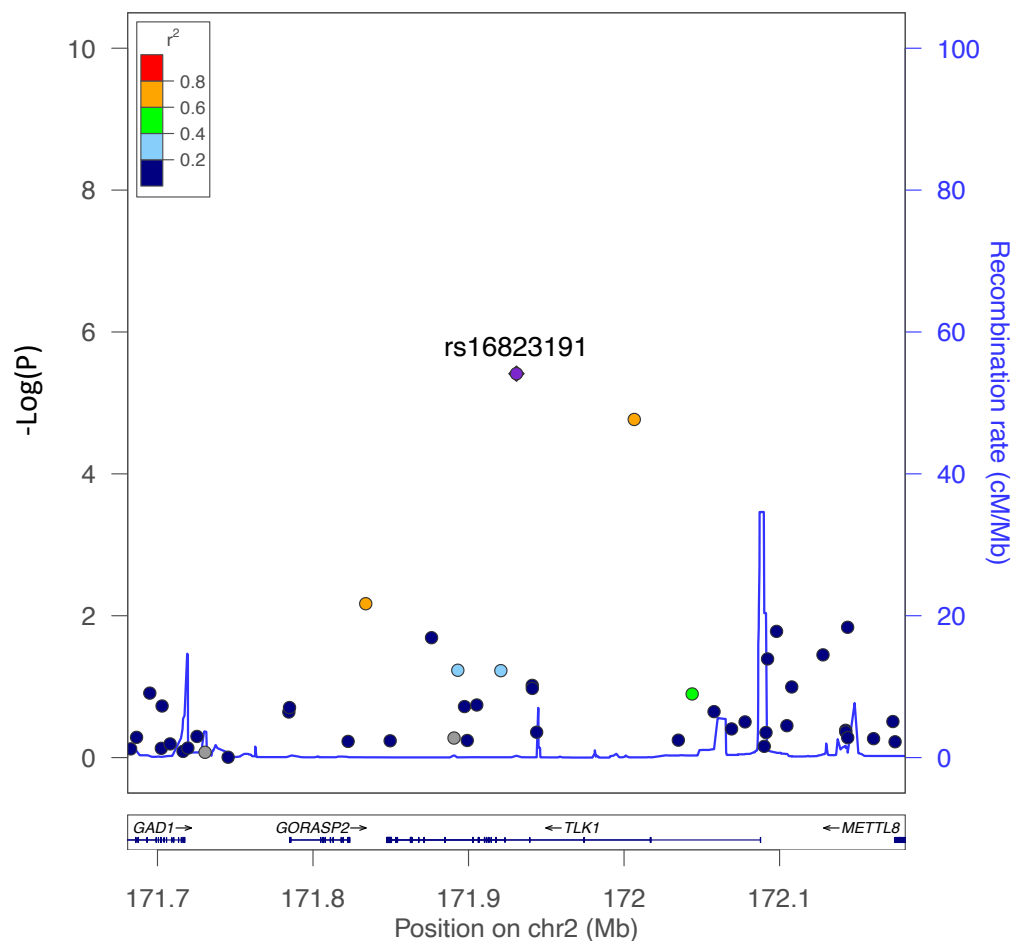

**b**

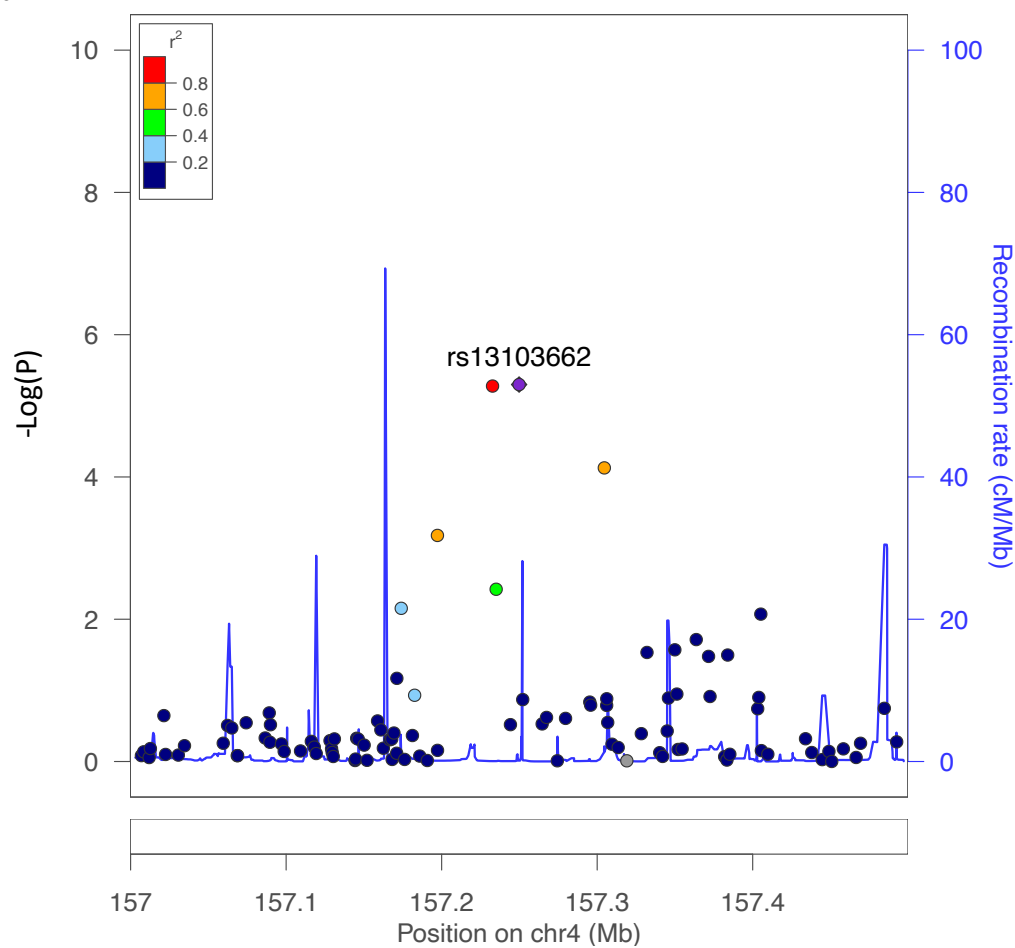

**Supplementary Figure S2.** Regional association plot for chr 9q22.33 (a) and 15q23 (b) regions

**a**

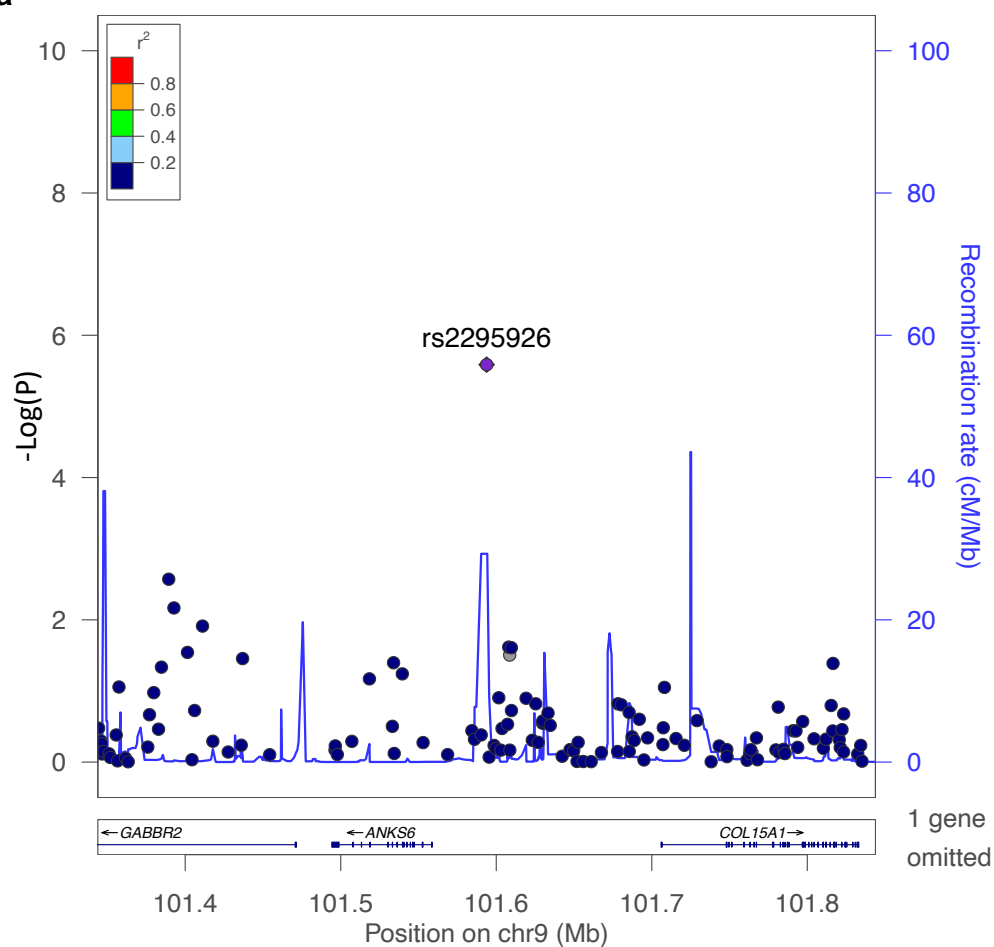

**b**

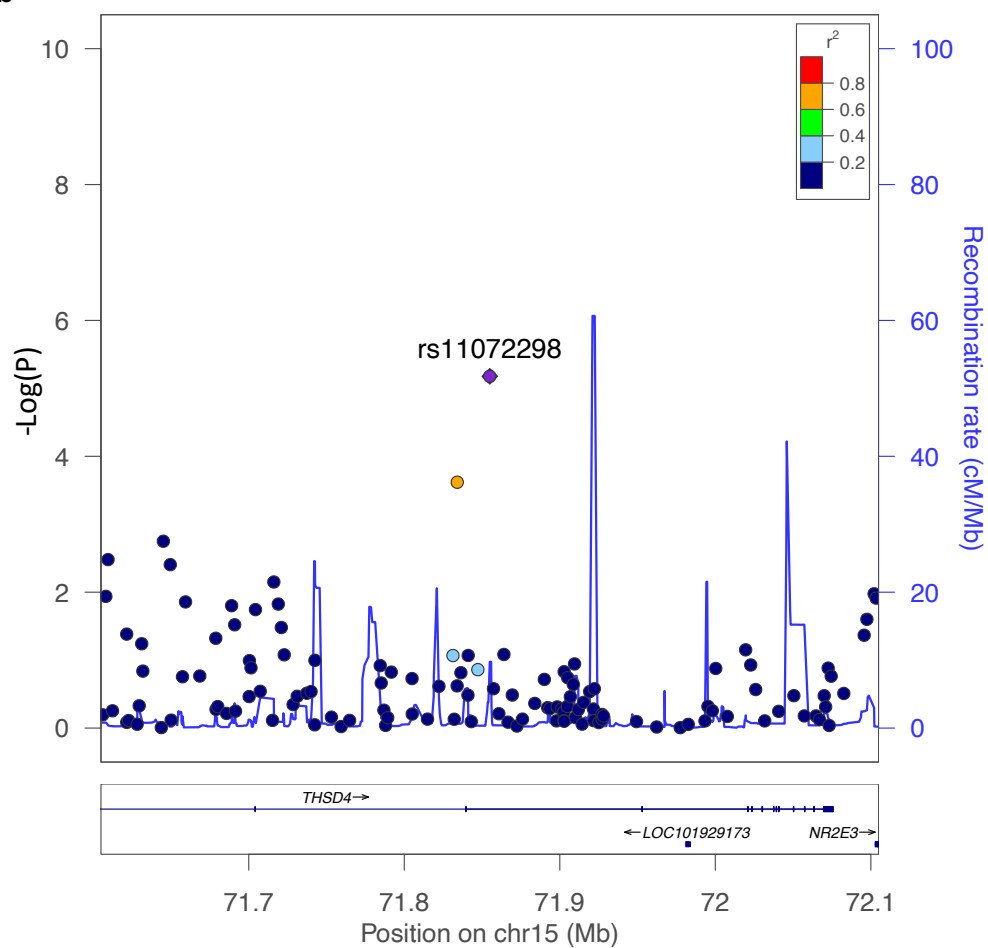

**Supplementary Figure S3.** Regional association plot for chr Xq13.1 (a) and Xq25 (b) regions

**a**

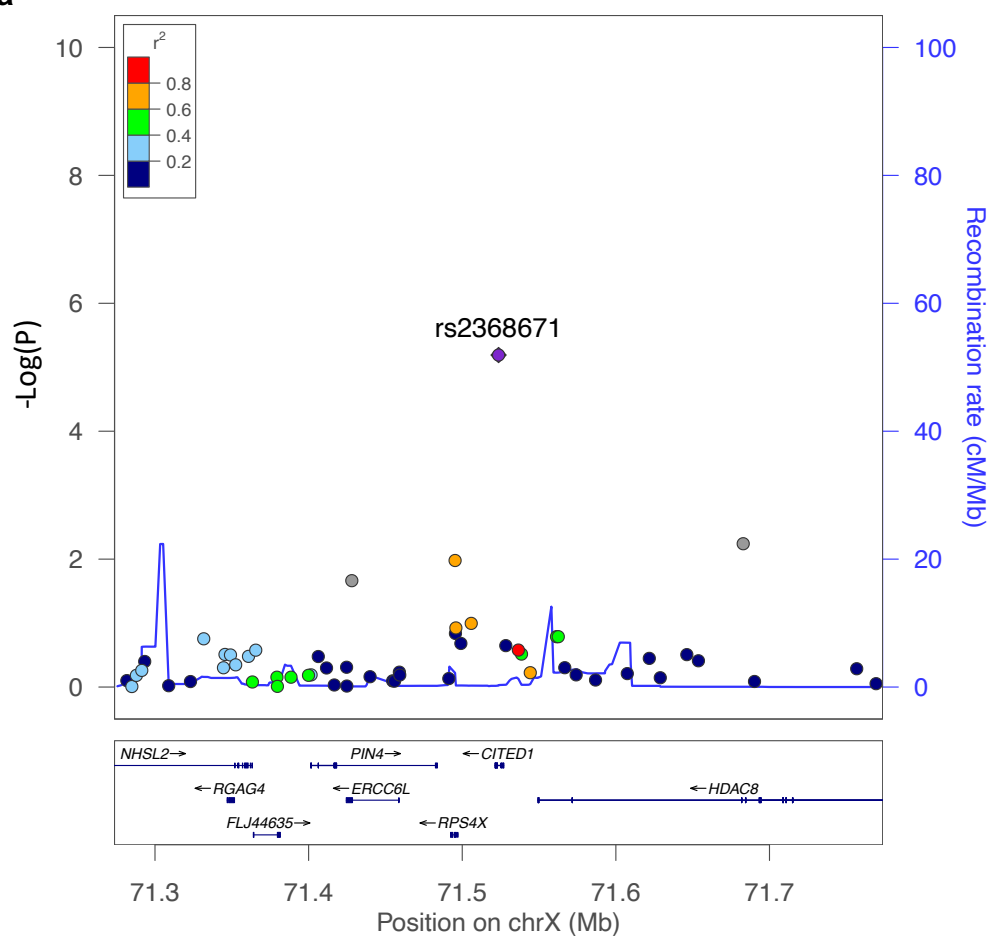

**b**

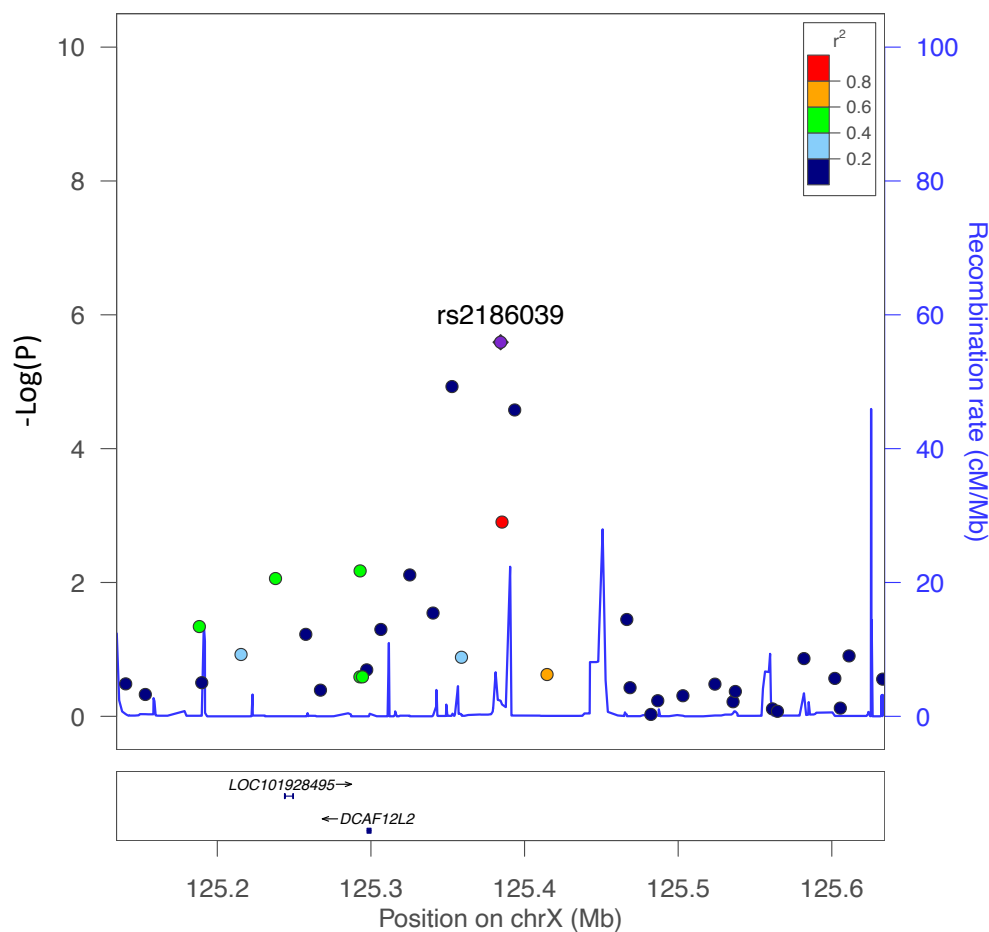

**Supplementary Figure S4.** Regional association plot for chromosome Xq26.3 region.

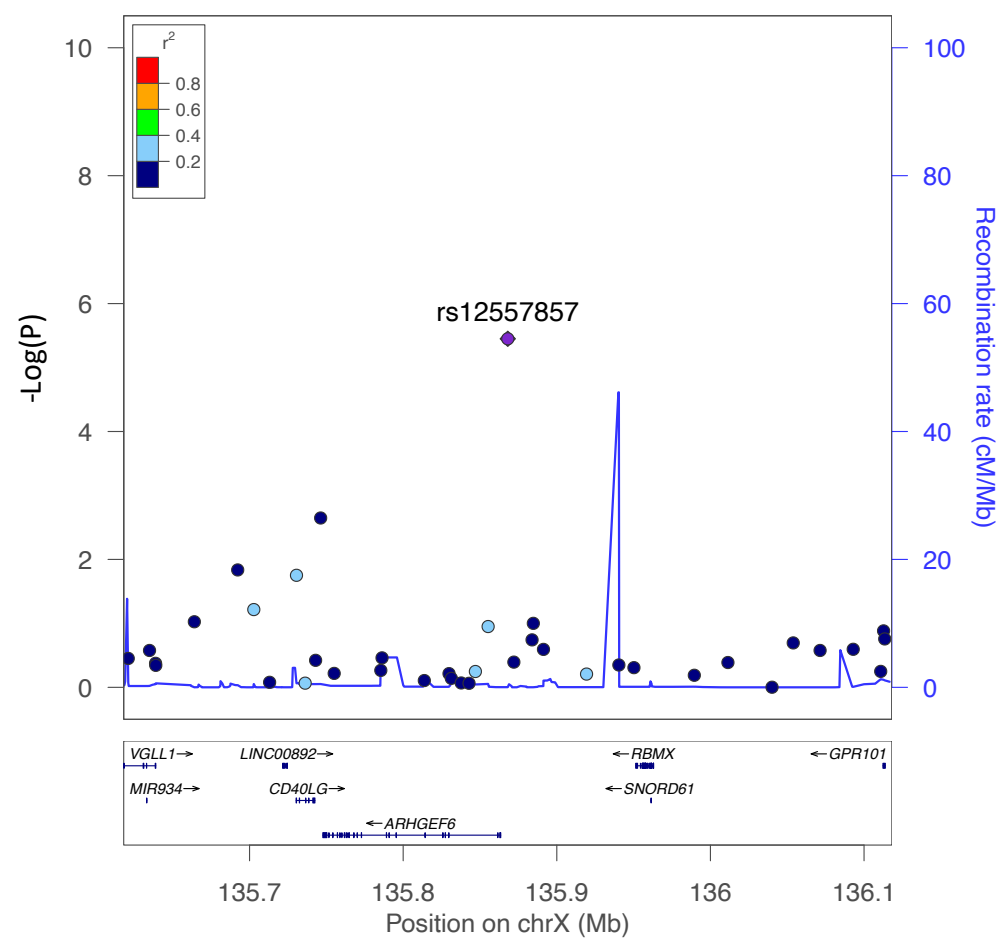

**Supplementary Figure S5.** *PIN4* expression in multiple tissues in relation to rs2368671 genotype.

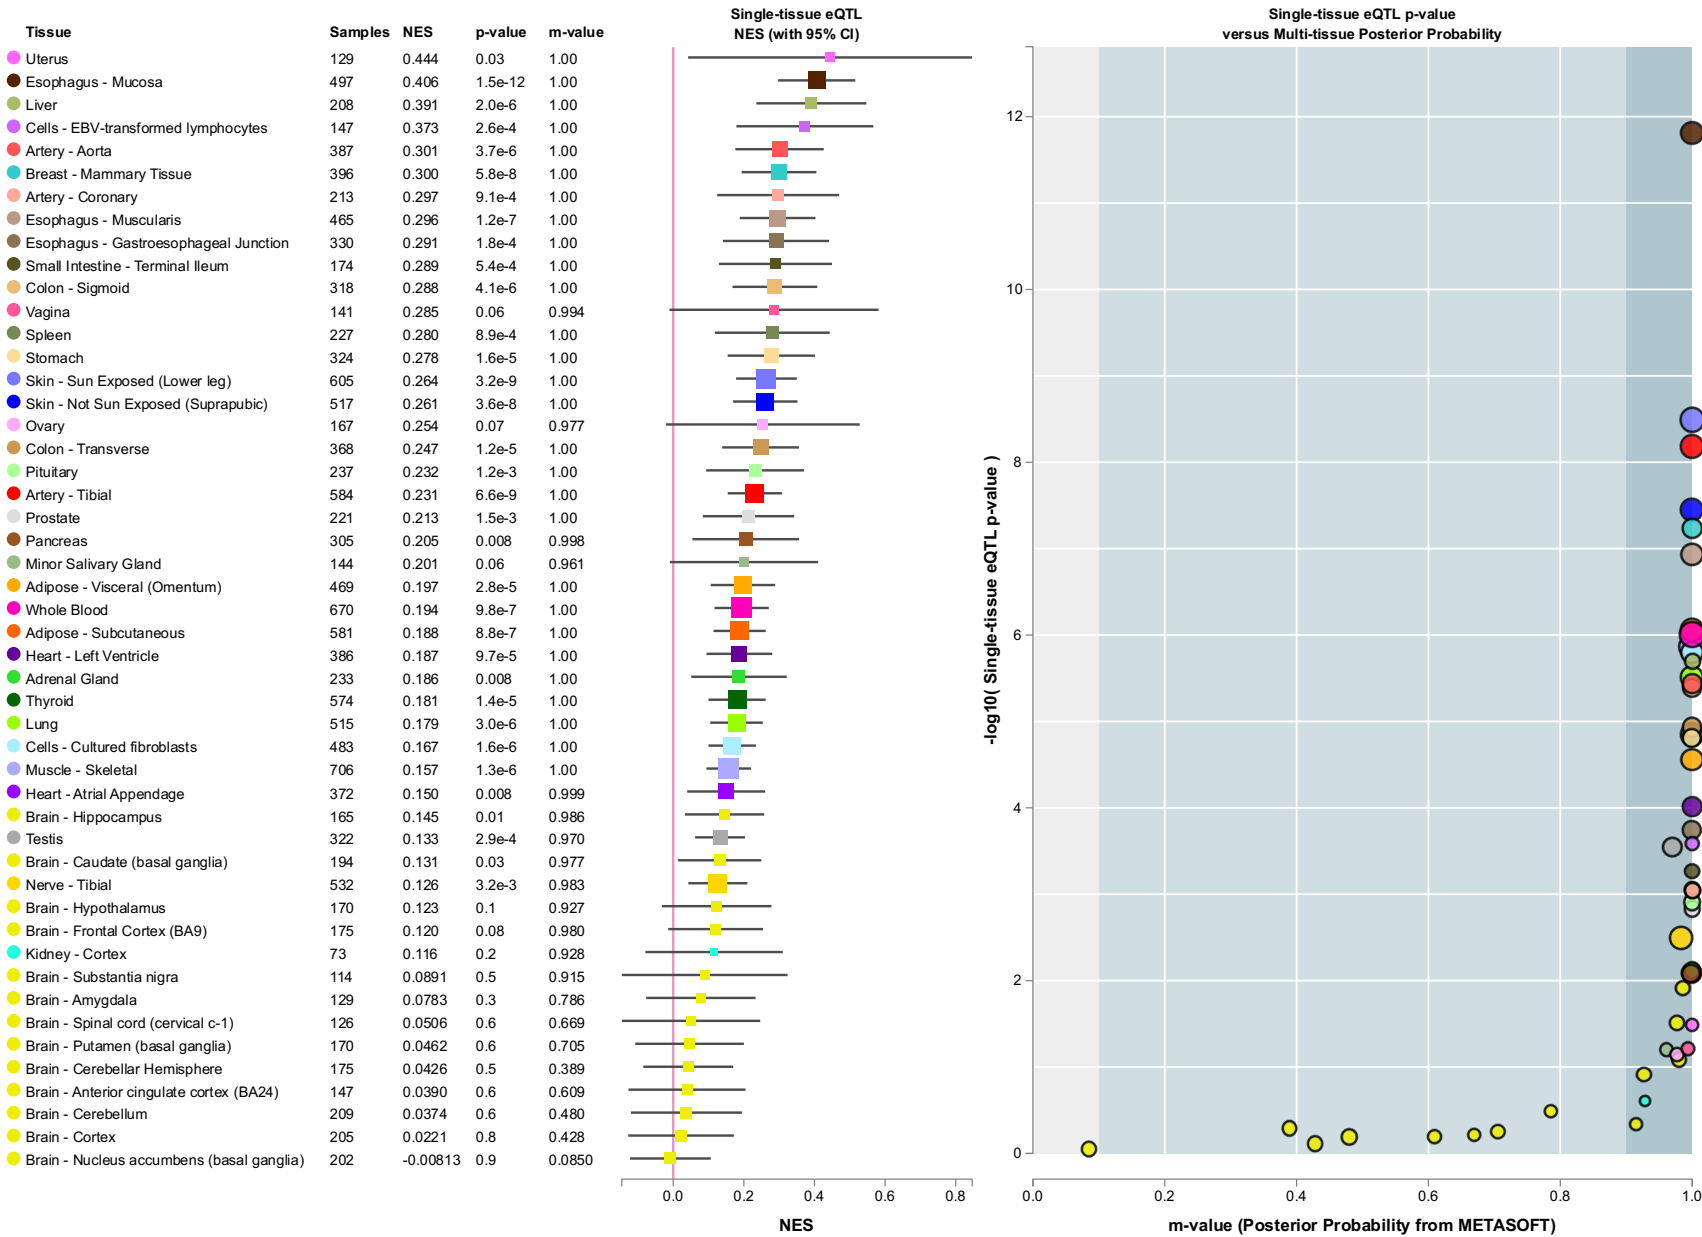



Supplementary Figure S6. DCAF12L2 expression in multiple tissues in relation to rs2186039 genotype

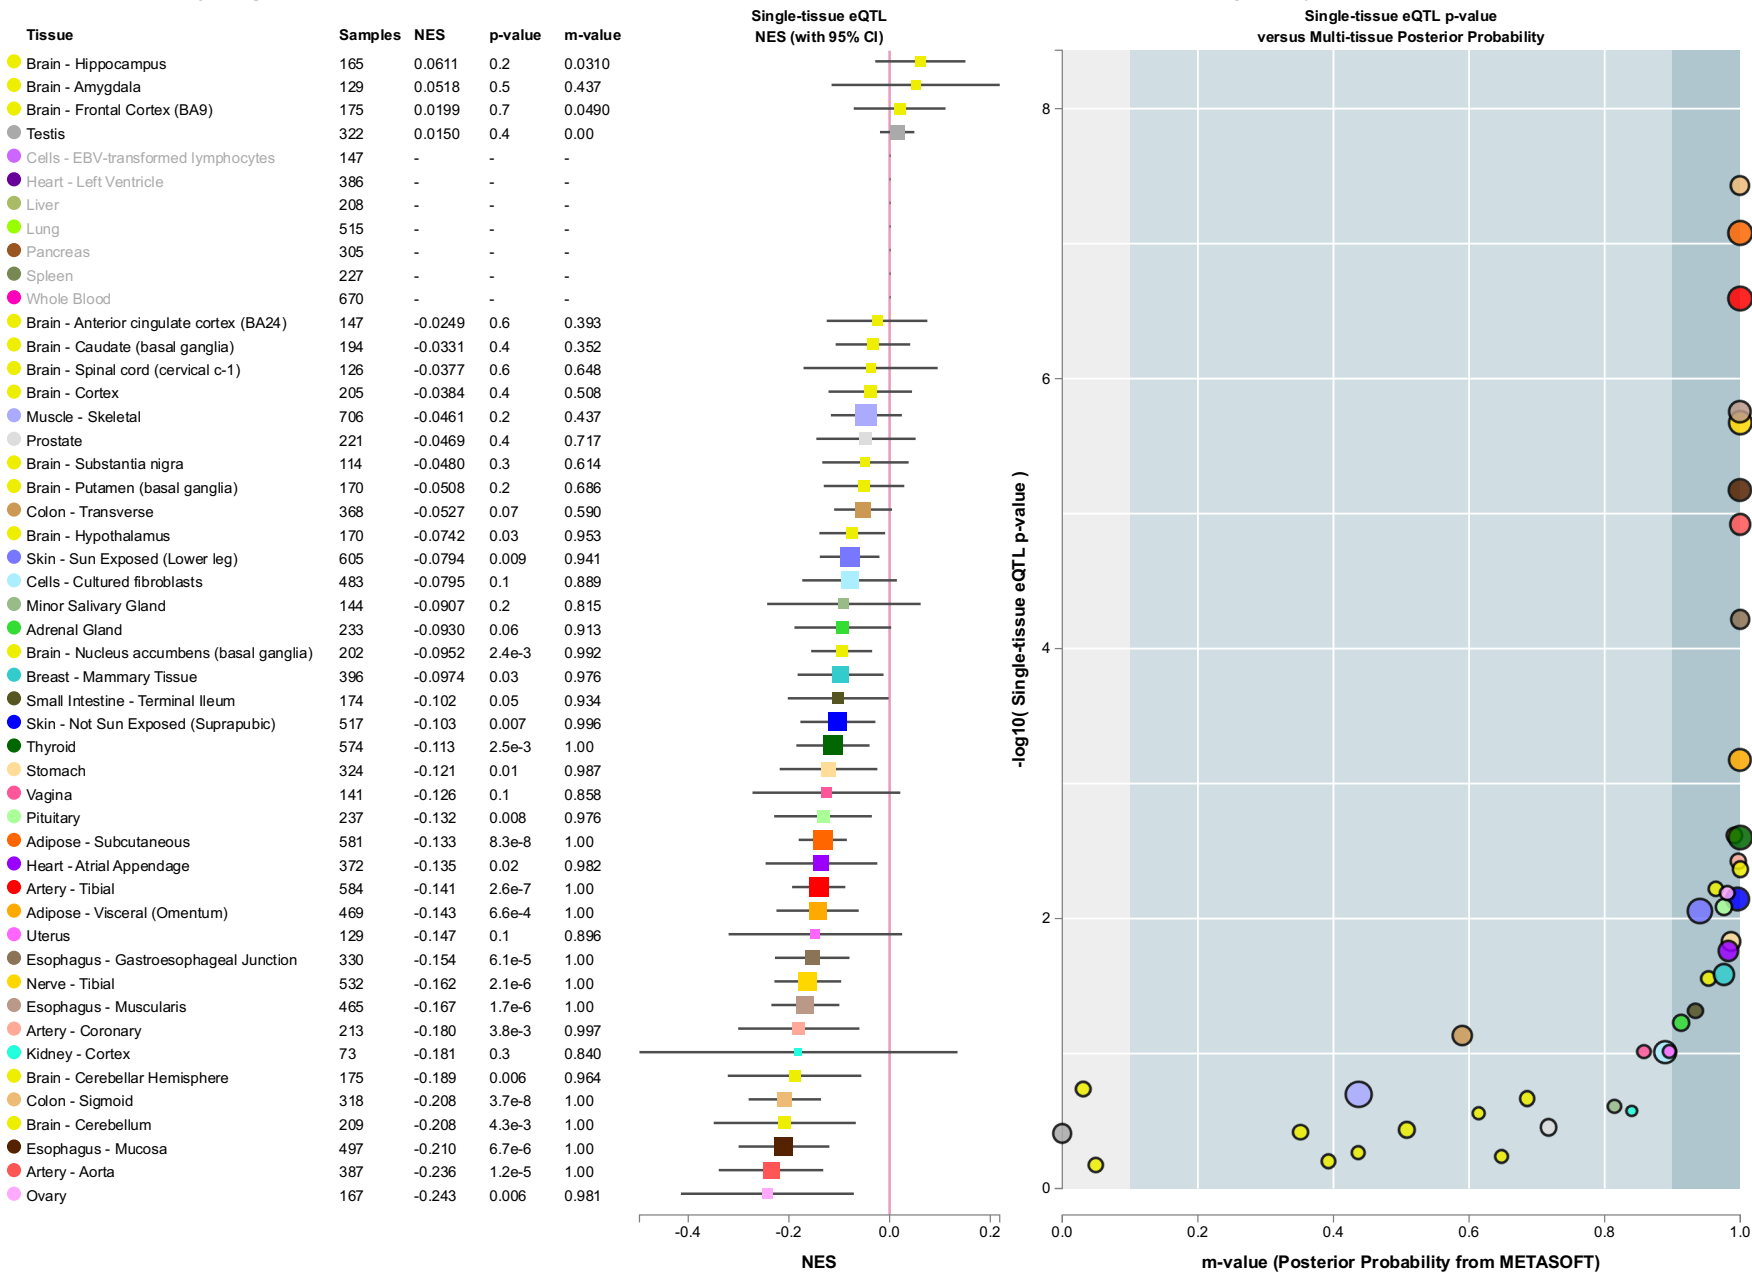

Supplementary Figure S7. *ARHGEF6* expression in multiple tissues in relation to rs12557857 genotype

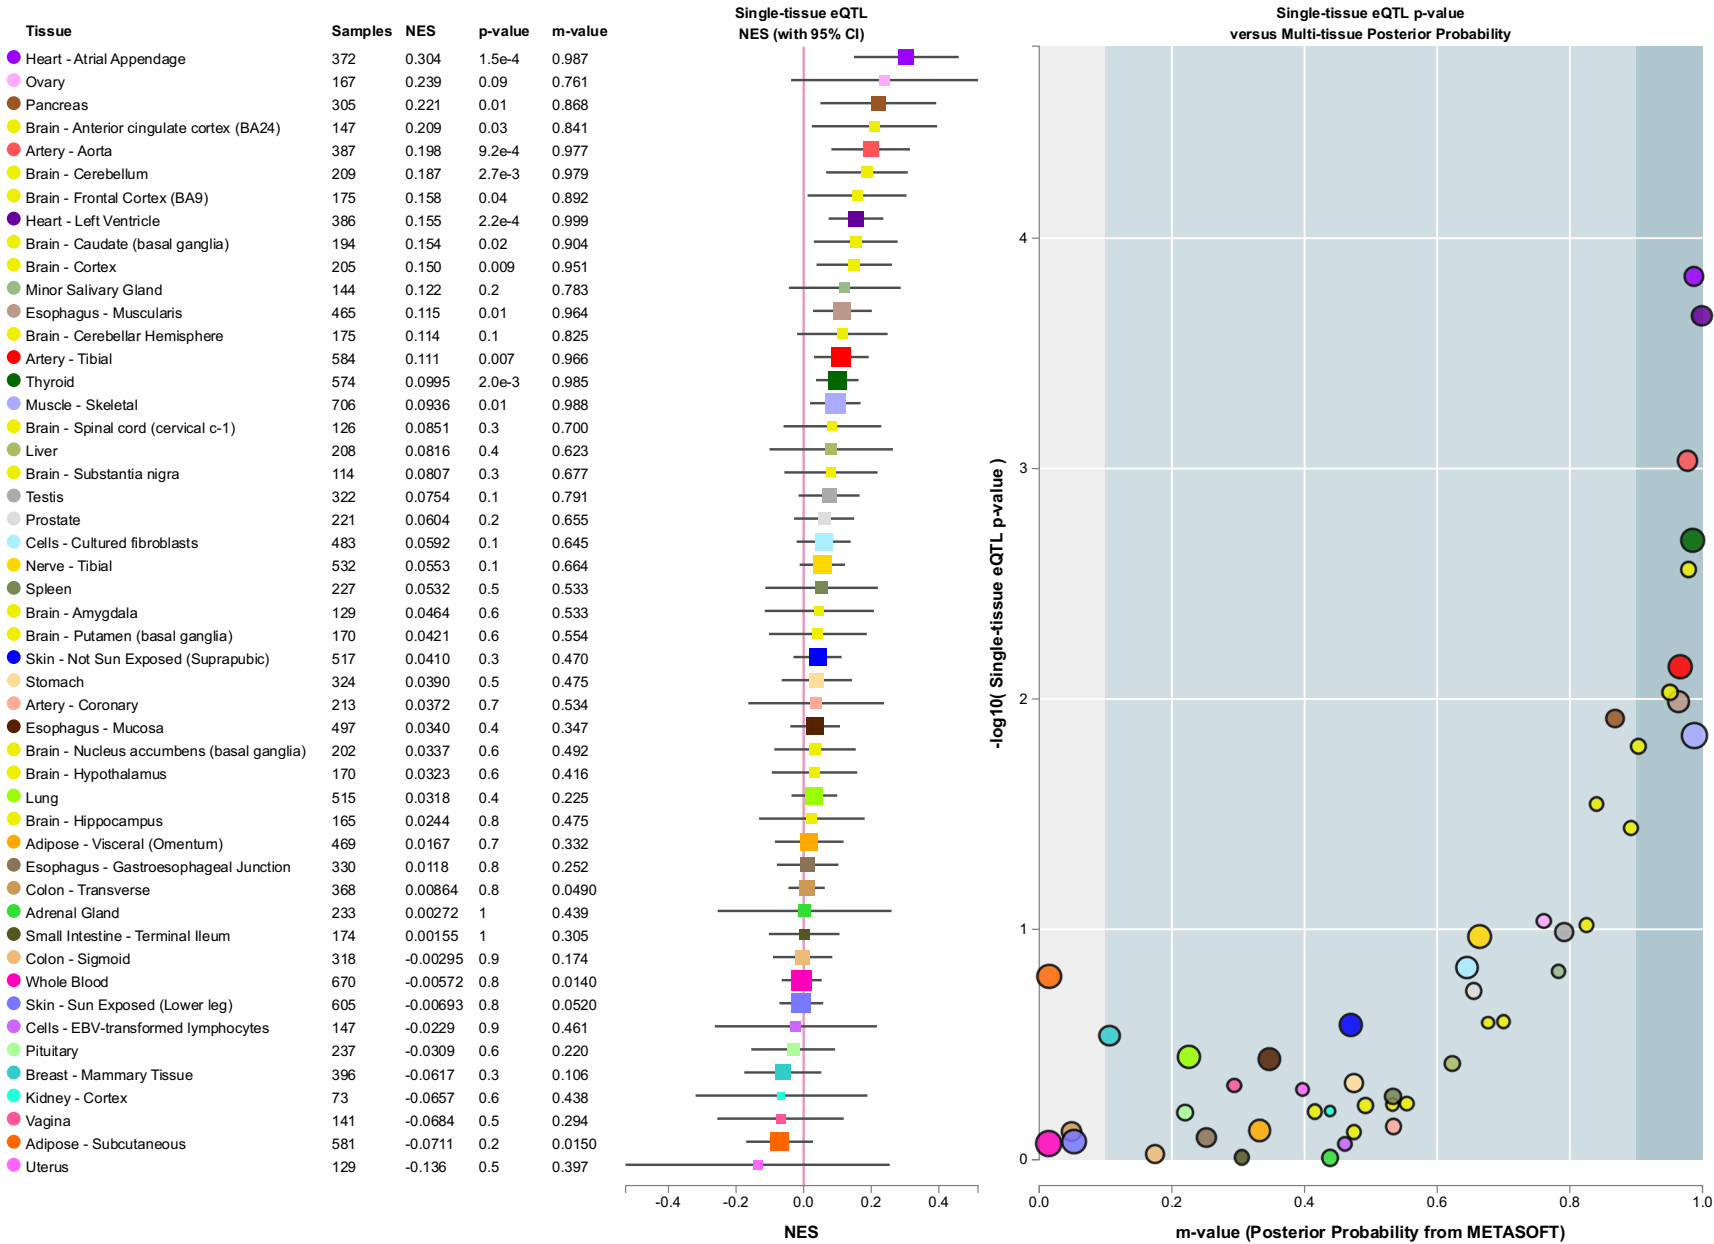

Adapted from GTEX portal (<https://gtexportal.org/home/>).
